# Supplementary material
Source: HighWire-hosted journal article supplement (http://jpet.aspetjournals.org/highwire/filestream/150434/field_highwire_adjunct_files/0/848SupplData.pdf)
Supplement: 848SupplData.pdf [file 848SupplData.pdf]

**Supplementary information for:**

# **Protein kinase A Mediated Effects of Protein kinase C Partial Agonist HMI-1a3 in Colorectal Cancer Cells**

Ilari Tarvainen\*, Rebecca C Nunn, Raimo K. Tuominen, Maria H. Jääntti, Virpi Talman

Affiliations

IT, RCN, RKT, MHJ and VT: Drug Research Program and Division of Pharmacology and Pharmacotherapy, Faculty of Pharmacy, University of Helsinki, Finland

\*Corresponding author

Ilari Tarvainen

Division of Pharmacology and Pharmacotherapy

Faculty of Pharmacy

University of Helsinki

P.O. Box 56 (Viikinkaari 5E)

FI-00014 Helsinki, FINLAND

Tel: +358504487245

Email: [ilari.tarvainen@helsinki.fi](mailto:ilari.tarvainen@helsinki.fi)

**Conflict of interest disclosure statement:** The authors declare no potential conflicts of interest.

## Supplemental Data

### LDH viability data

Table S1. Necrotic cell death in Caco2 cells after 24-h exposure to the test compounds, measured by LDH assay. Results are presented as mean (%) of cytotoxicity (N=3).

|          | DMSO | 1a3         |             |           |           |           |            |            |
|----------|------|-------------|-------------|-----------|-----------|-----------|------------|------------|
|          |      | 0,1 $\mu$ M | 0,5 $\mu$ M | 1 $\mu$ M | 2 $\mu$ M | 4 $\mu$ M | 10 $\mu$ M | 20 $\mu$ M |
| Mean (%) | 0.00 | -0.14       | 1.88        | 2.07      | 2.79      | 1.93      | 1.56       | 4.16       |
| stdev    | 2.13 | 2.95        | 1.86        | 1.39      | 1.44      | 1.31      | 2.02       | 3.07       |

Table S2. Necrotic cell death in Colo205 cells after 24-h exposure to the test compounds, measured by LDH assay. Results are presented as mean (%) of cytotoxicity (N=3).

|          | DMSO | 1a3         |             |           |           |           |            |            |
|----------|------|-------------|-------------|-----------|-----------|-----------|------------|------------|
|          |      | 0,1 $\mu$ M | 0,5 $\mu$ M | 1 $\mu$ M | 2 $\mu$ M | 4 $\mu$ M | 10 $\mu$ M | 20 $\mu$ M |
| Mean (%) | 0.00 | 1.83        | 0.06        | 0.12      | 1.52      | 1.38      | 1.39       | 1.57       |
| stdev    | 1.40 | 5.43        | 3.38        | 2.00      | 1.29645   | 2.04      | 1.58       | 2.79       |

Table S3. Necrotic cell death in HT29 cells after 24-h exposure to the test compounds, measured by LDH assay. Results are presented as mean (%) of cytotoxicity (N=3).

|          | DMSO | 1a3         |             |           |           |           |            |            |
|----------|------|-------------|-------------|-----------|-----------|-----------|------------|------------|
|          |      | 0,1 $\mu$ M | 0,5 $\mu$ M | 1 $\mu$ M | 2 $\mu$ M | 4 $\mu$ M | 10 $\mu$ M | 20 $\mu$ M |
| mean (%) | 0.00 | -2.89       | -1.48       | -1.52     | -1.05     | -1.89     | -2.32      | -1.73      |
| stdev    | 5.10 | 5.13        | 3.34        | 3.87      | 2.29      | 4.92      | 5.67       | 6.64       |

# Immunoblotting

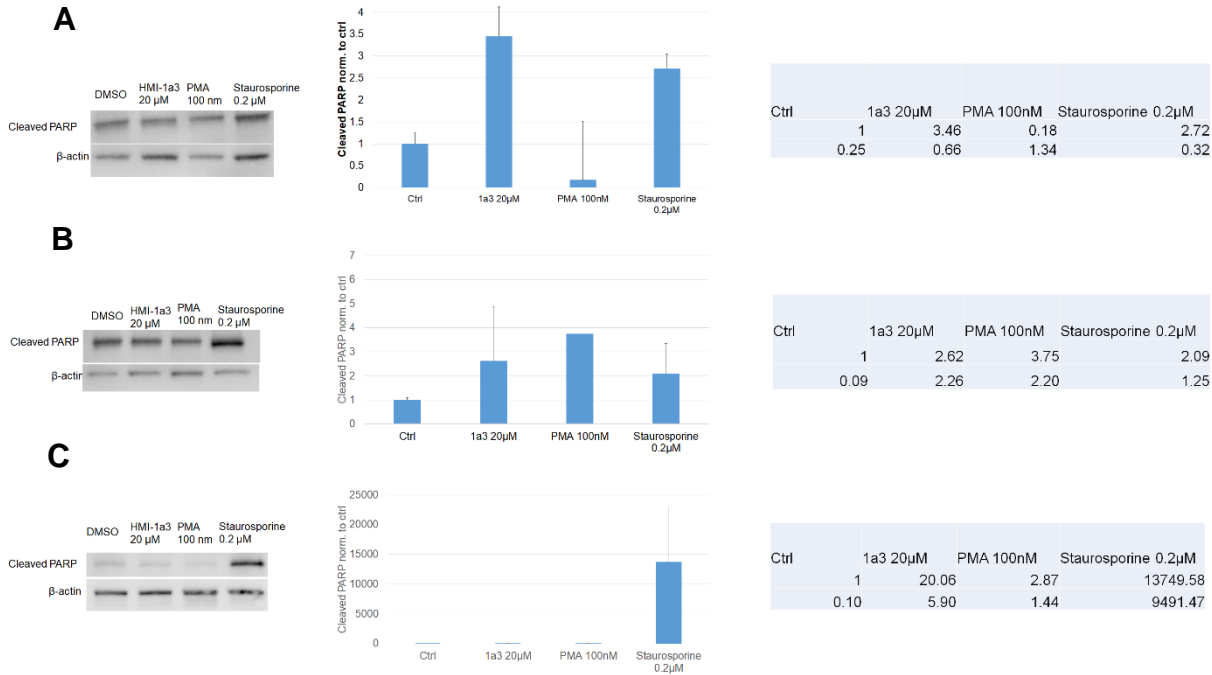

**Figure S1. HMI-1a3 induces apoptosis in all tested CRC lines. HMI-1a3 increases the cleaved PARP apoptosis marker expression in Caco2 (A), Colo205 (B) and HT29 (C) cell lines.**

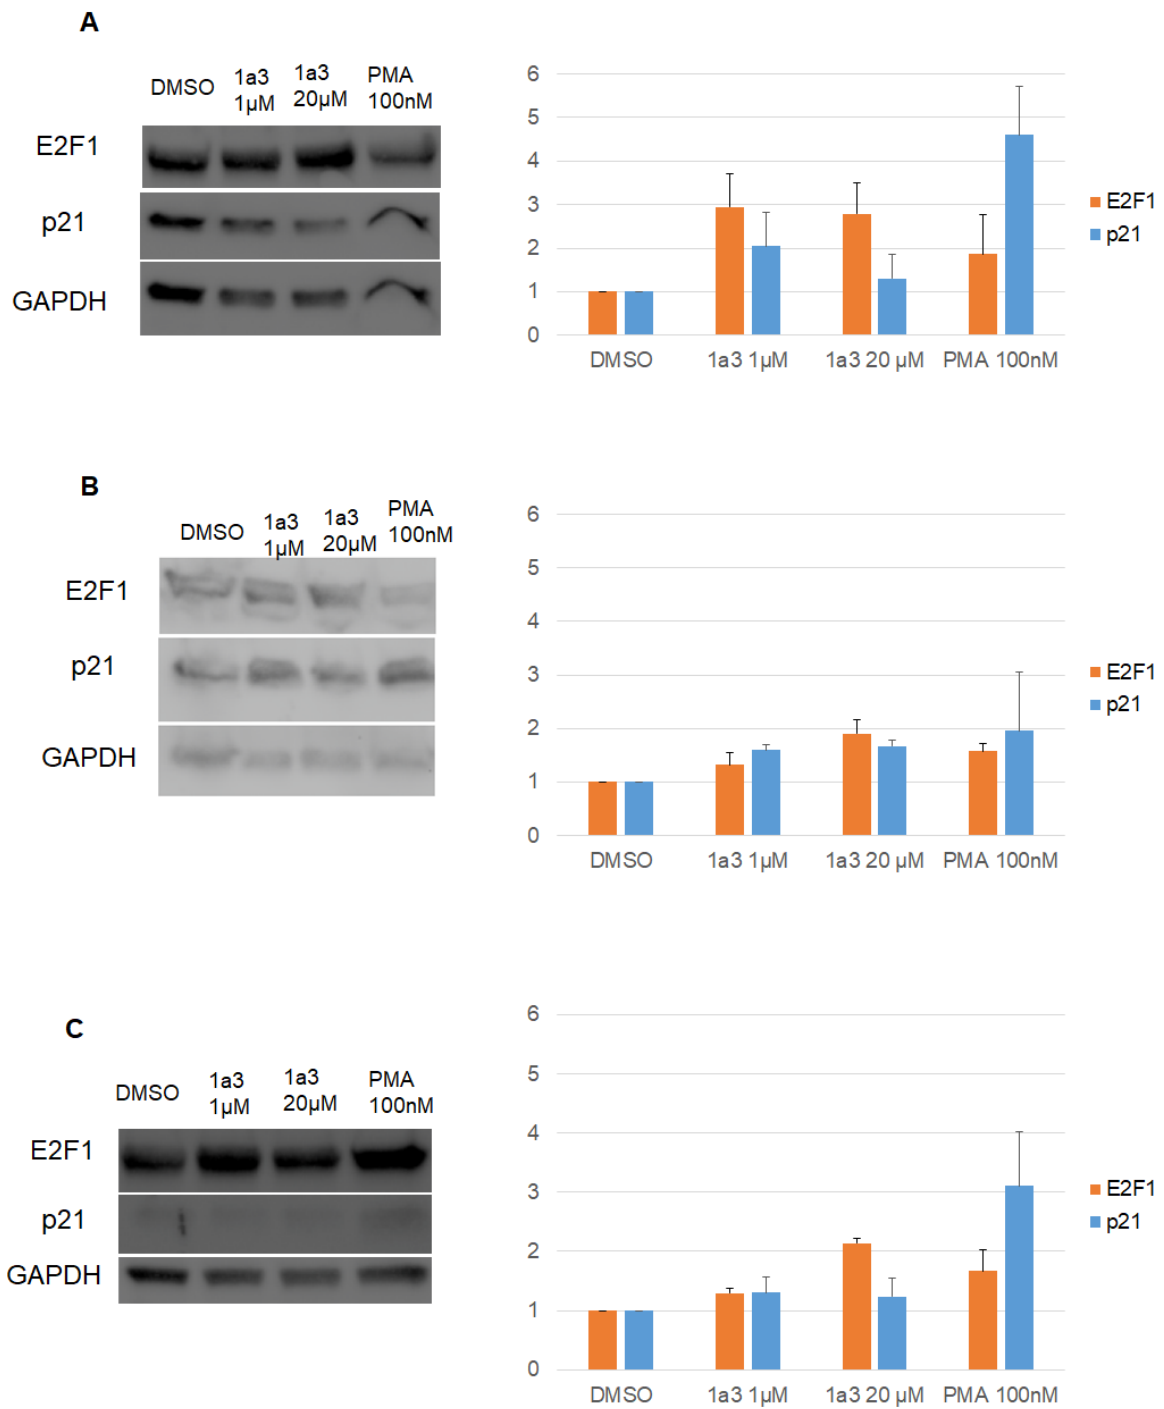

**Figure S2.** E2F1 and p21 expression in Caco2 (A), Colo205 (B) and HT29 (C) cells after 48-h exposure.

# PamGene data

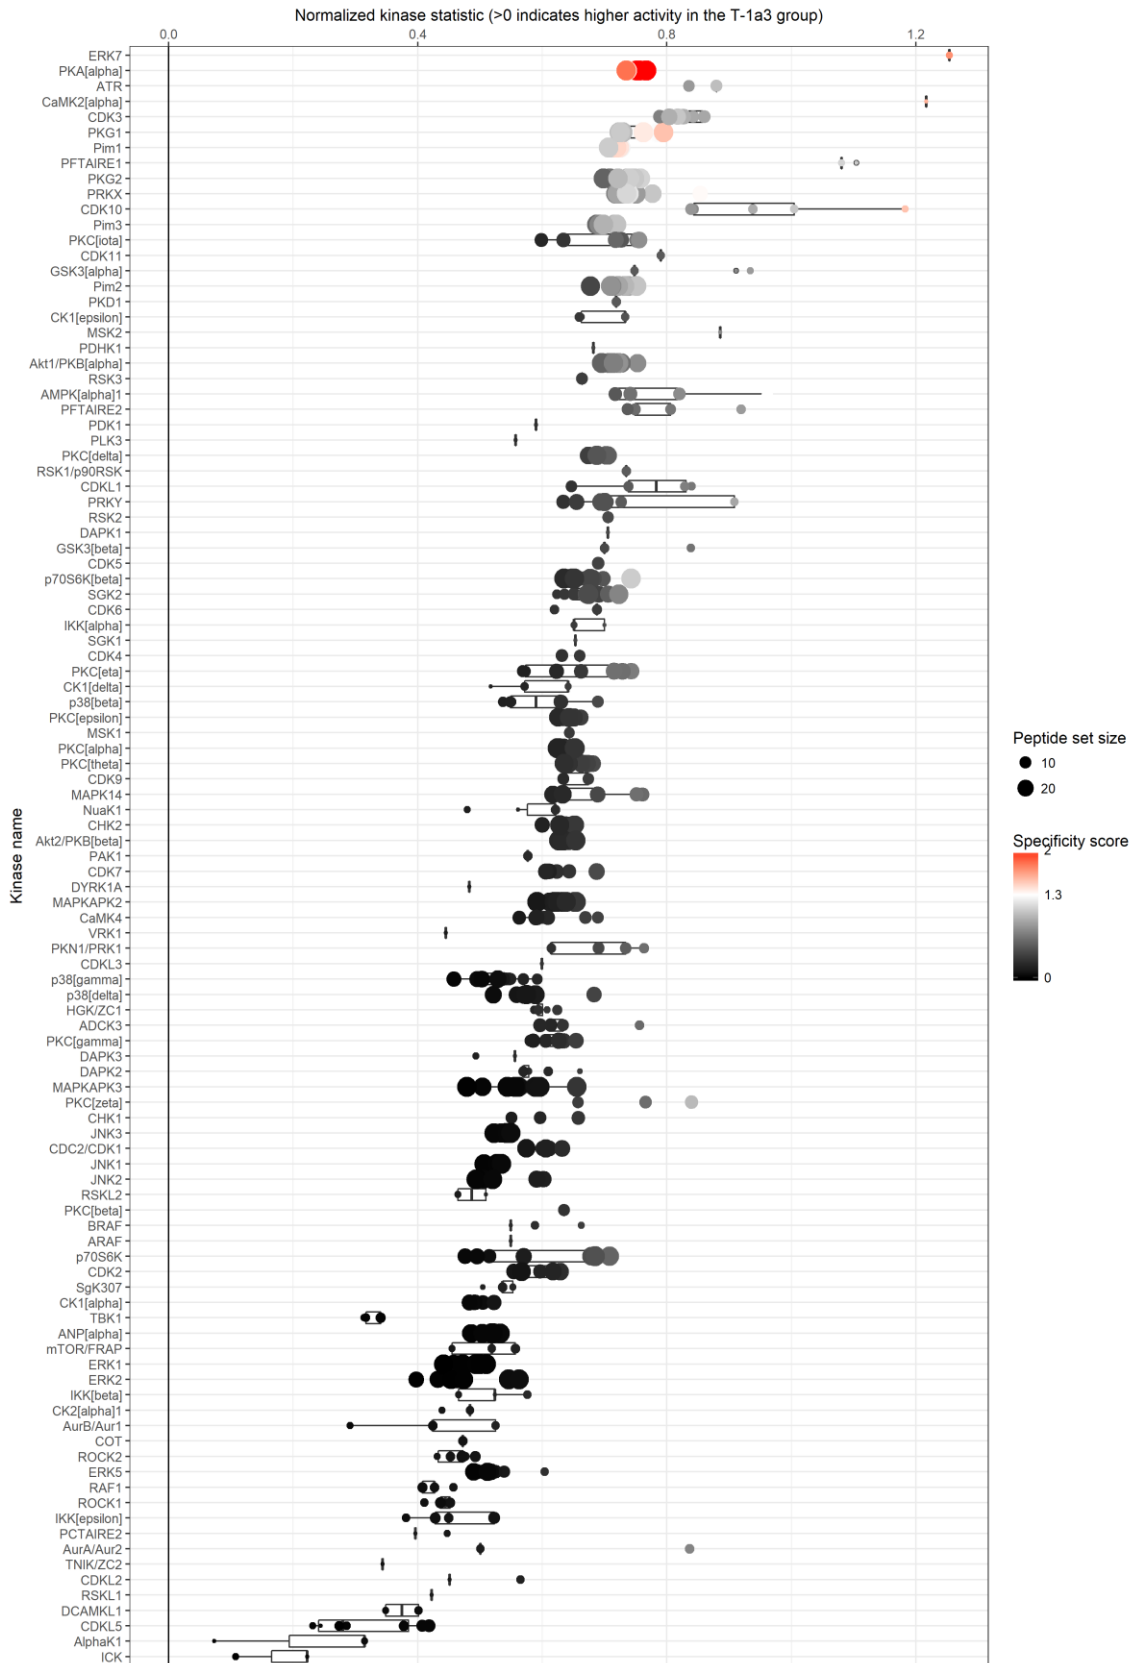

**Figure S3.** Kinase tree after 30-minute HMI-1a3 20 $\mu$ M treatment on Colo205 cell lysates versus DMSO treated cell lysates. The normalized kinase statistic is shown in the X-axis, and values >0 indicate activation compared to DMSO control. The colour of the point represents the specificity score from the kinase analysis, and a higher specificity score indicates a higher likelihood of the corresponding kinase to contributing to the observed phosphorylation changes. The size of the point indicates the peptide set size used for analysis.

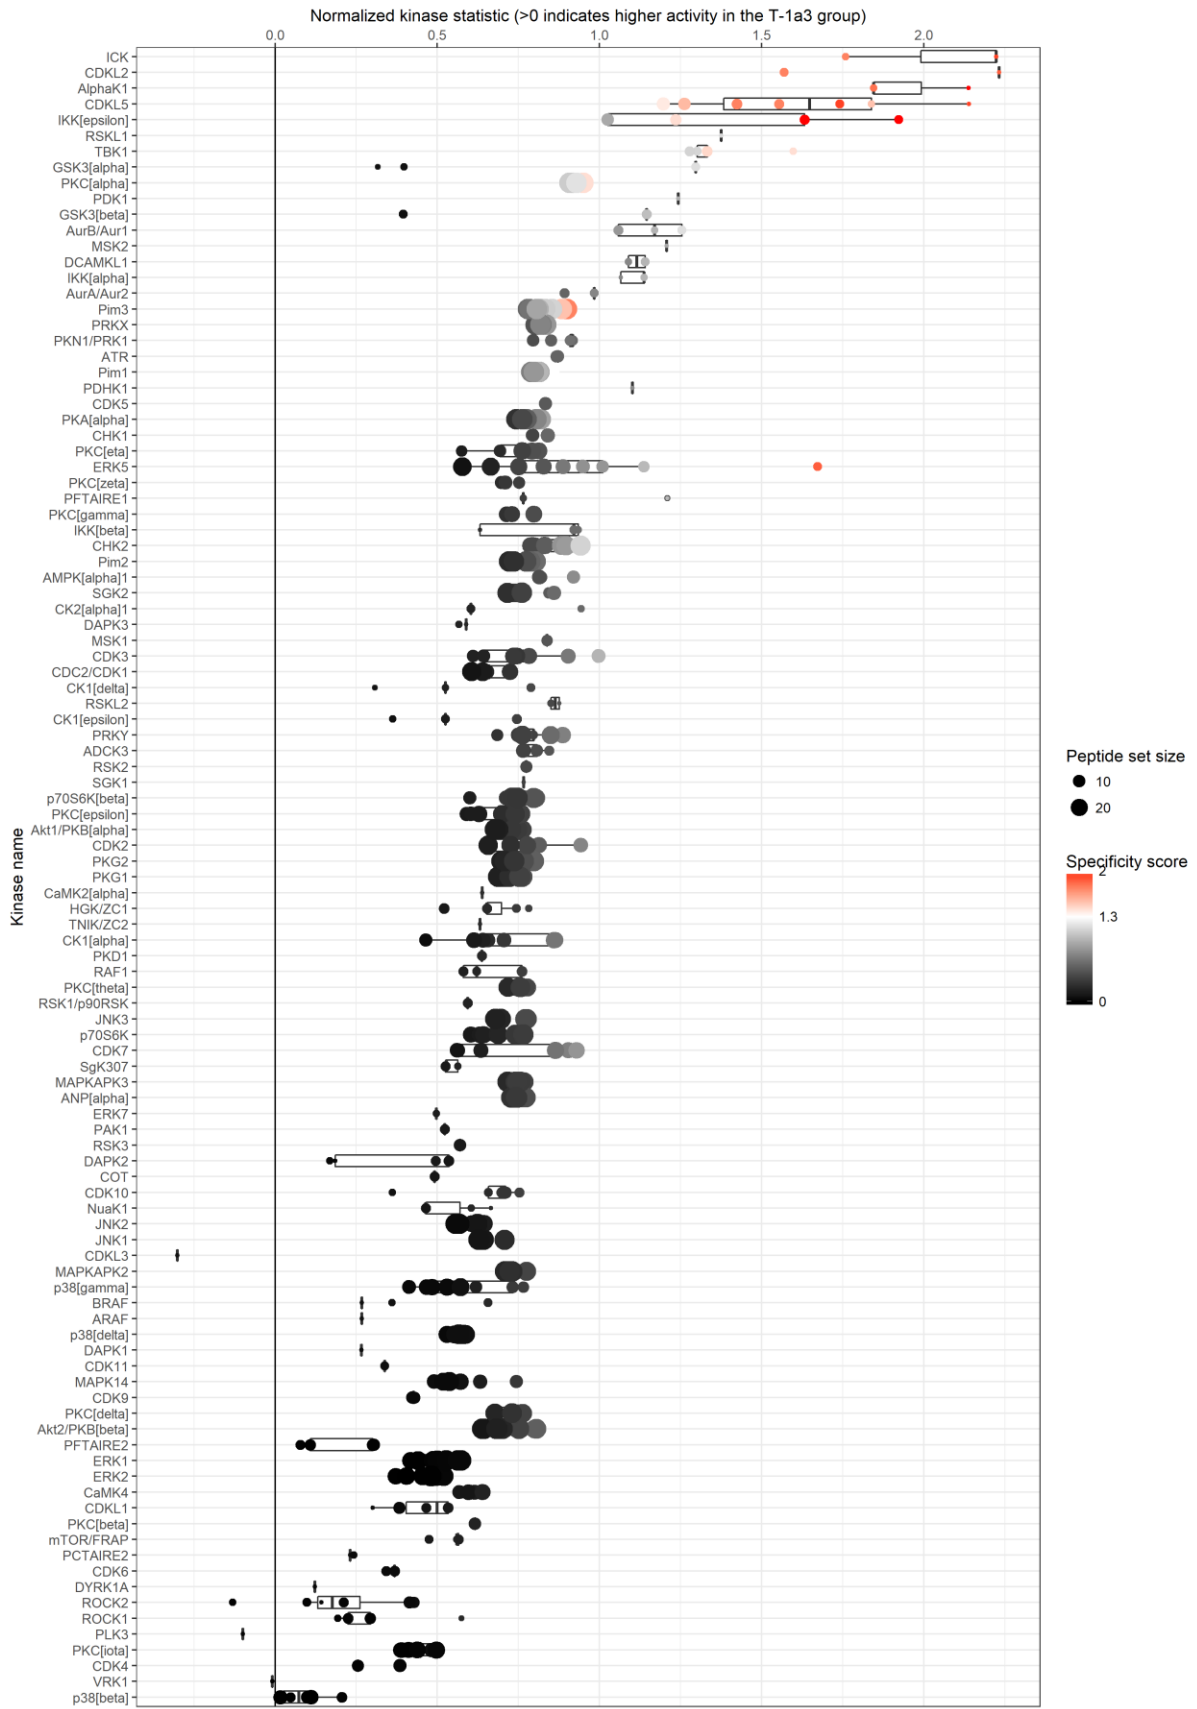

**Figure S4.** Kinase tree after 2-hour HMI-1a3 20 $\mu$ M treatment on Colo205 cell lysates versus DMSO treated cell lysates. The normalized kinase statistic is shown in the X-axis, and values >0 indicate activation compared to DMSO control. The colour of the point represents the specificity score from the kinase analysis, and a higher specificity score indicates a higher likelihood of the corresponding kinase to contributing to the observed phosphorylation changes. The size of the point indicates the peptide set size used for analysis.
